# Supplementary material for: Host-guest interactions of chiral Schiff-base macrocyclic Zn(II) complexes with α-amino acids
Source: Research Square preprint supplement (doi:10.21203/rs.3.rs-7930688/v1), 2025-11-20
Supplement: Supplementary file 1 [file 93f2c700134a54b5ec234b80.docx]

Supplementary Information

Host-guest interactions of chiral Schiff-base macrocyclic Zn(II) complexes with *α*-amino acids

Chao Huang, Xiao-Mao Tian, Li-Xia Chen*, Bi-Xue Zhu*

*Key Laboratory of Macrocyclic and Supramolecular Chemistry of Guizhou Province, Guizhou University, Guiyang 550025, China*

*E-mail: chenlx4780@163.com (L.-X. Chen), bxzhu@gzu.edu.cn (B.-X. Zhu)


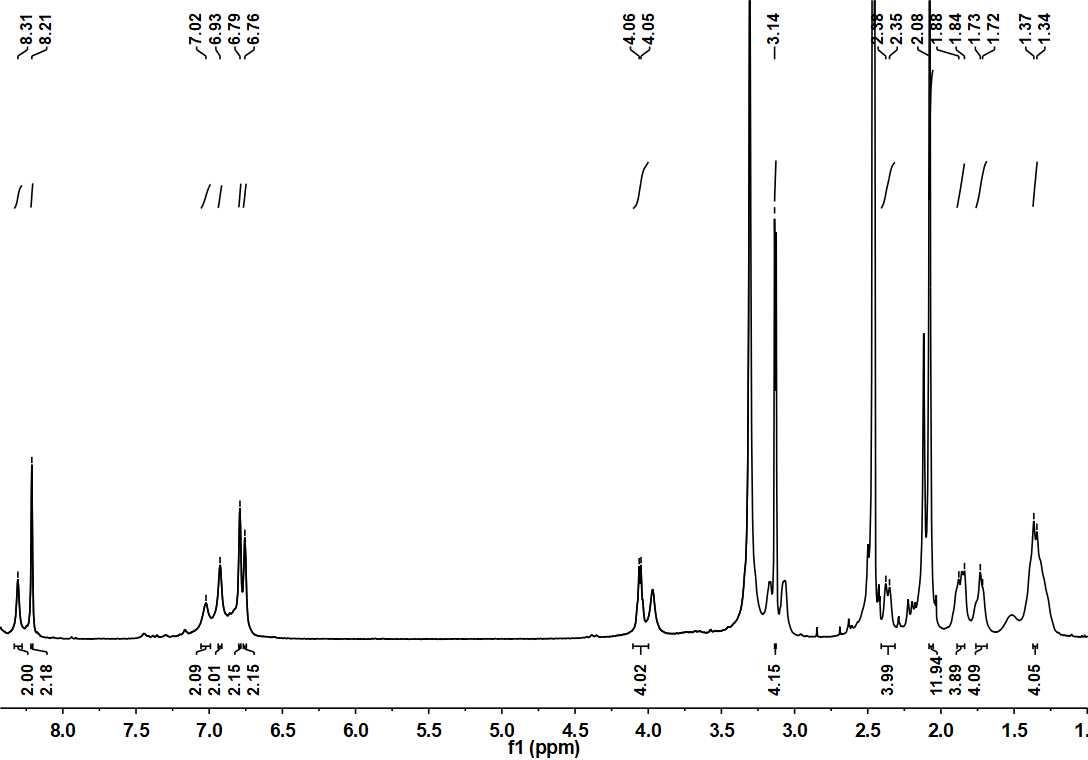


**Fig. S1** 1H NMR for **M***R*,*R*.


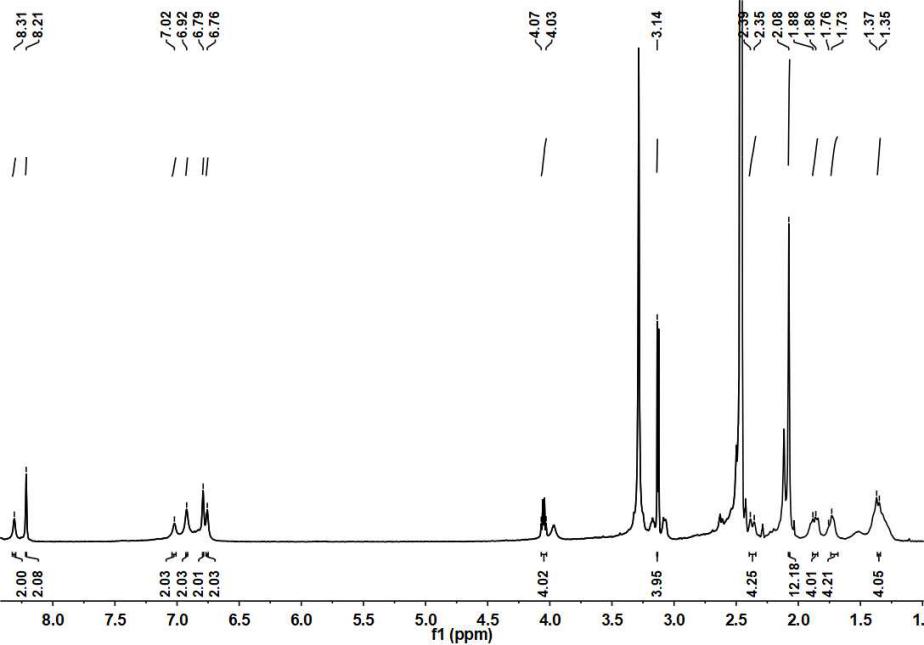


**Fig. S2** 1H NMR for **M***S*,*S*.


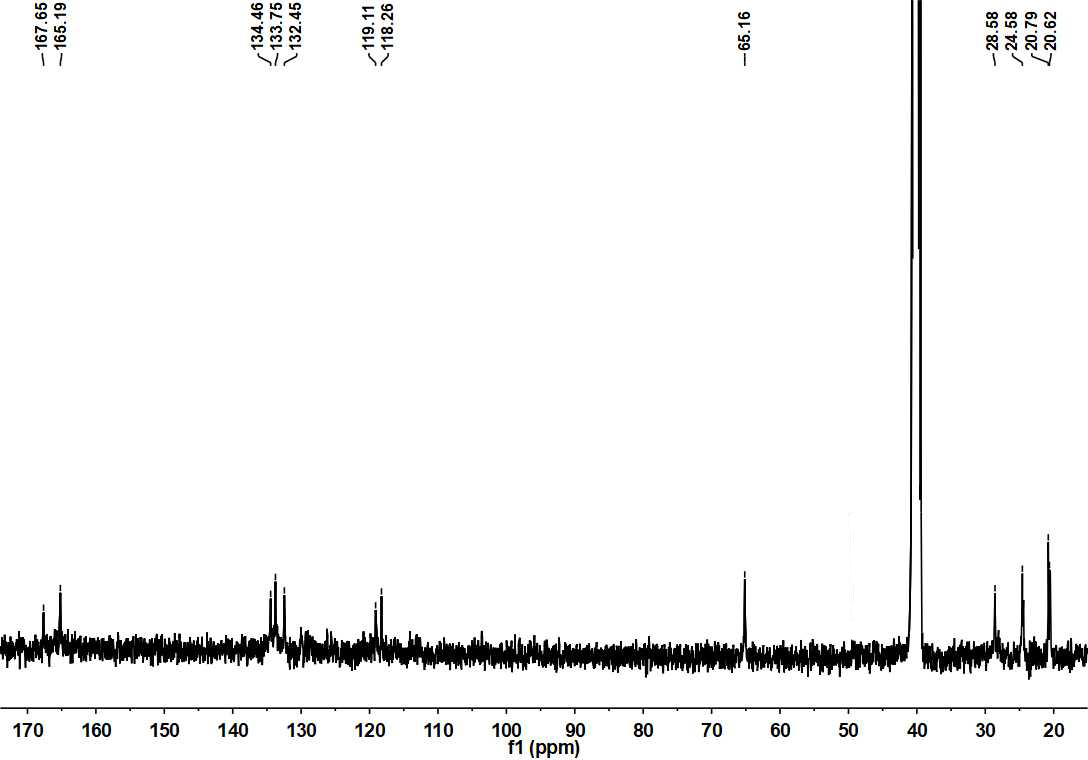


**Fig. S3** 13C NMR for **M***R*,*R*.


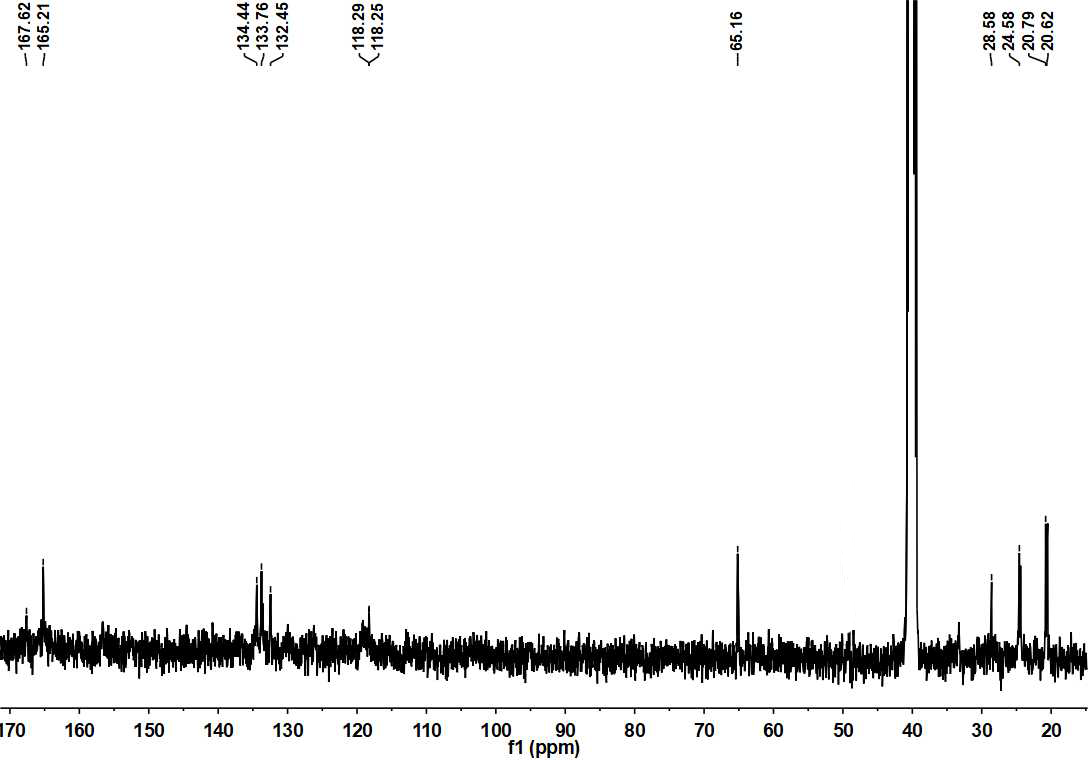


**Fig. S4** 13C NMR for **M***S*,*S*.


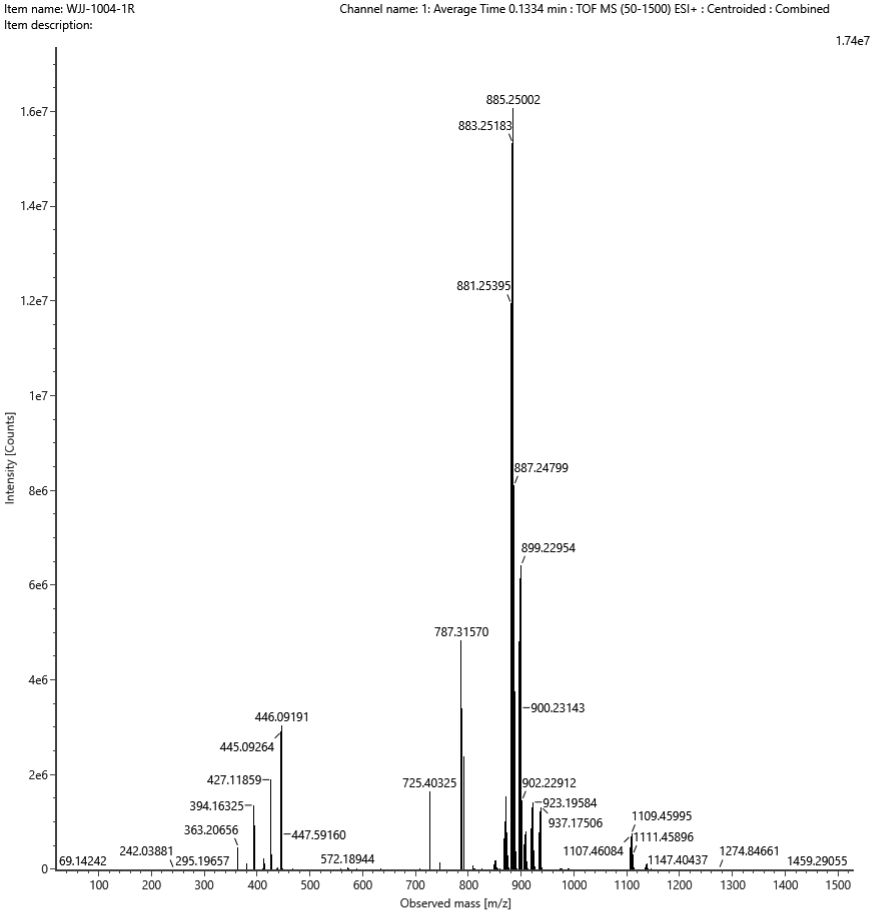


**Fig. S5** ESI-MS for **M***R*,*R*.


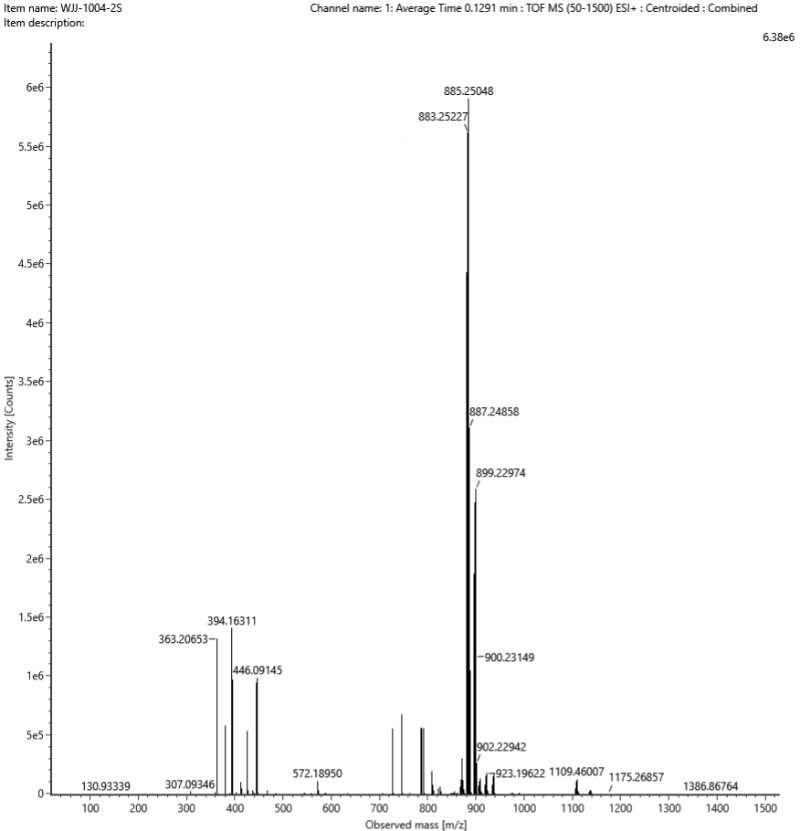


**Fig. S6** ESI-MS for **M***S*,*S*.


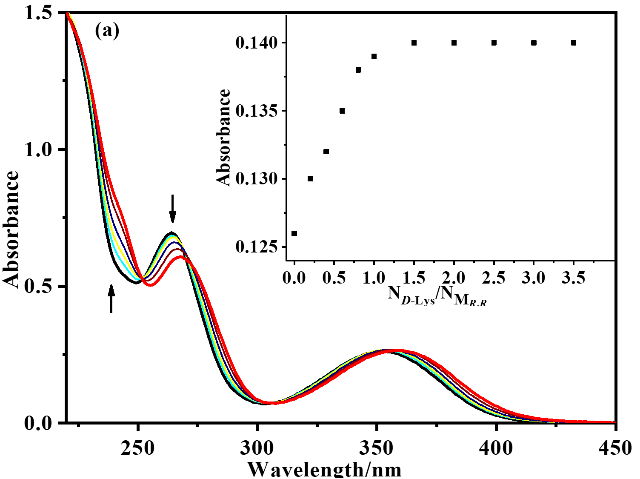

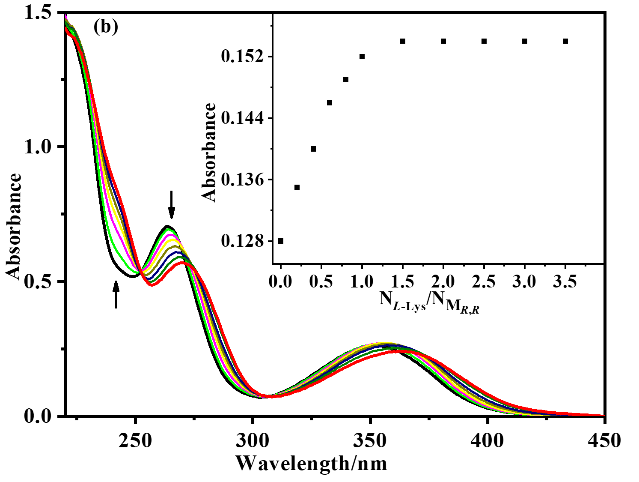


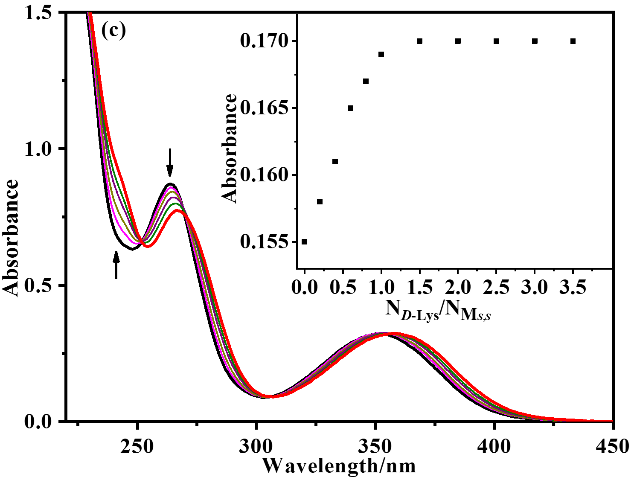

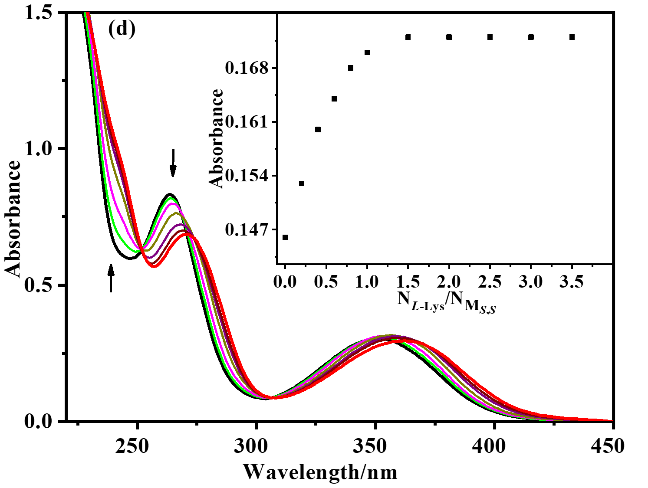


**Fig. S7** UV-Vis spectral changes of **M***R*,*R* upon addition of *D*-Lys (a) and *L*-Lys (b). UV-Vis spectral changes of **M***S*,*S* upon addition of *D*-Lys (c) and *L*-Lys (d).

**Fig. S8** Job’s plots of **M***R*,*R* with *D*-Arg (a) and *L*-Arg (b). Job’s plots of **M***S*,*S* with *D*-Arg (c) or *L*-Arg (d).

**Fig. S9** Job’s plots of **M***R*,*R* with *D*-Lys(a) or *L*-Lys (b); Job’s plots of **M***S*,*S* with *D*-Lys (c) or *L*-Lys (d).

**Fig. S10** Job’s plots of **M***R*,*R* with *D*-Glu (a) or *L*-Glu (b); Job’s plots of **M***S*,*S* with *D*-Glu(c) or *L*-Glu (d).


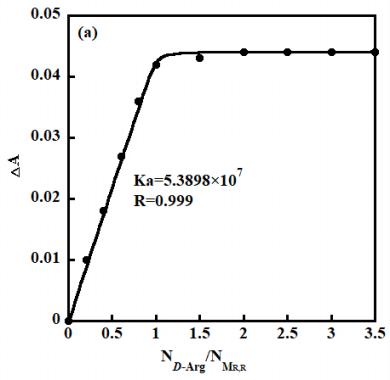

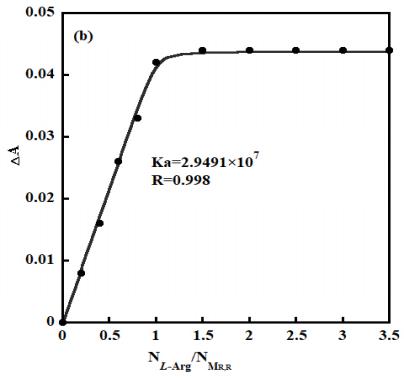


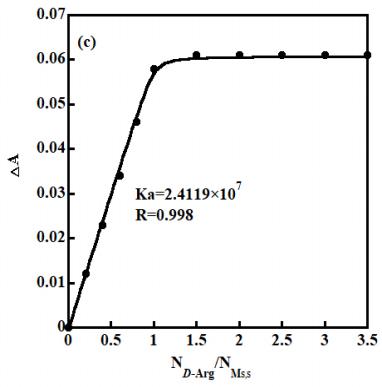

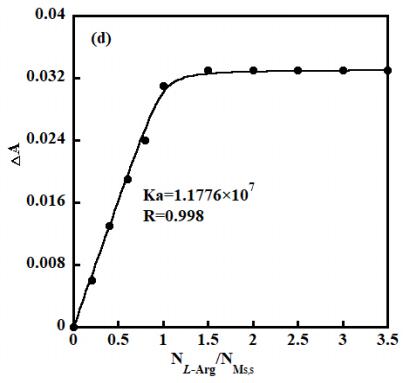


**Fig. S11** The binding constants of **M***R*,*R* with *D*-Arg(a) or *L*-Arg(b) calculated from the nonlinear curve fitting. The binding constants of **M***S*,*S* with *D*-Arg(c) or *L*-Arg(d) calculated from the nonlinear curve fitting. λ= 364 nm

**
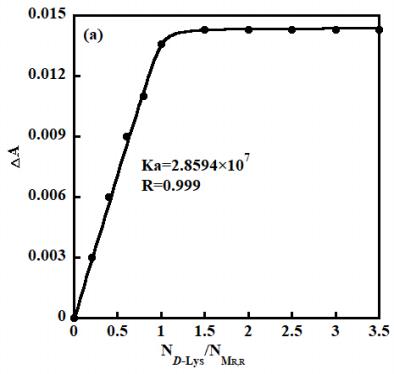
**
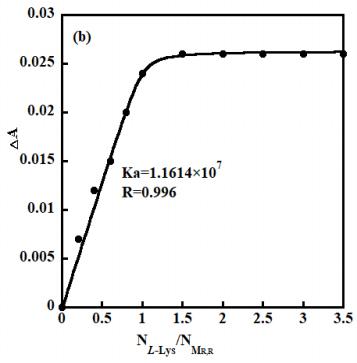


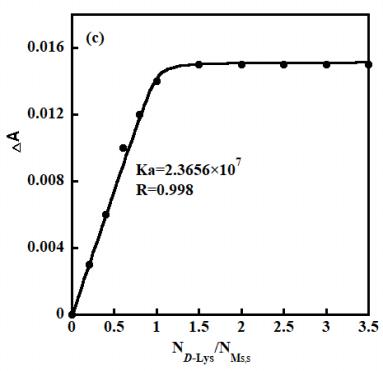
 **
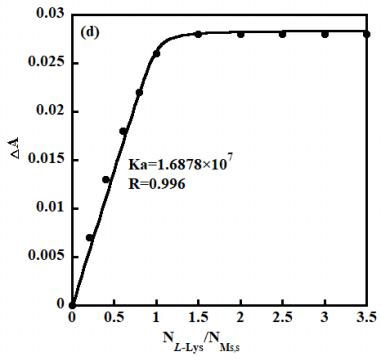
**

**Fig. S12** The binding constants of **M***R*,*R* with *D*-Lys(a) or *L*-Lys(b) calculated from the nonlinear curve fitting. The binding constants of **M***S*,*S* with *D*-Lys(c) or *L*-Lys(d) calculated from the nonlinear curve fitting. λ= 380 nm


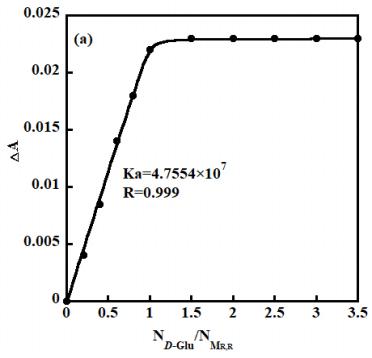

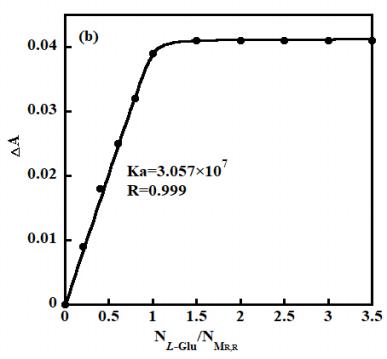


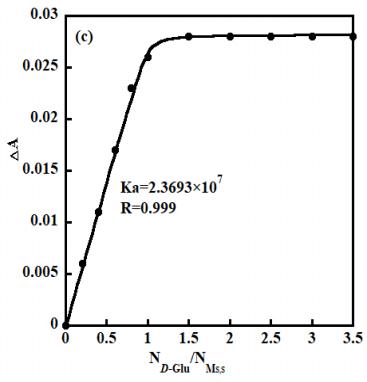

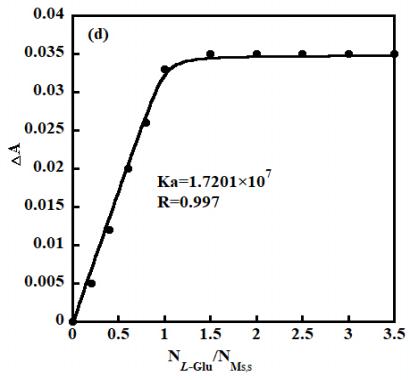


**Fig. S13** The binding constants of **M***R*,*R* with *D*-Glu(a) or *L*-Glu(b) calculated from the nonlinear curve fitting. The binding constants of **M***S*,*S* with *D*-Glu(c) or *L*-Glu(d) calculated from the nonlinear curve fitting. λ = 285 nm.


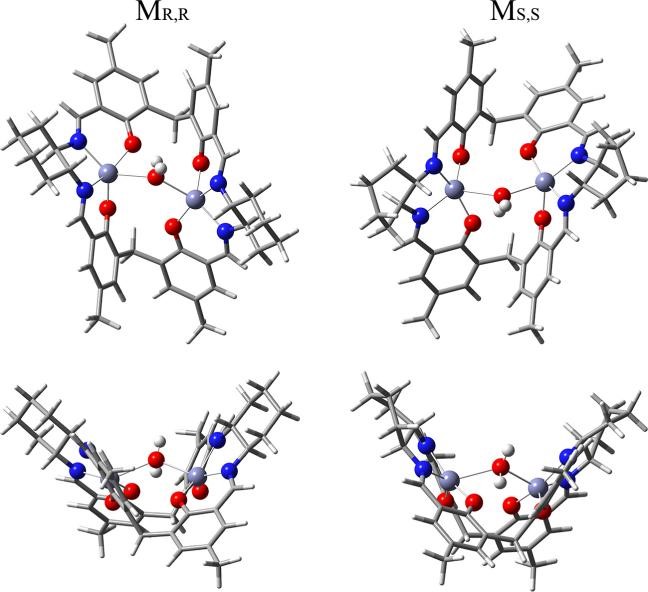

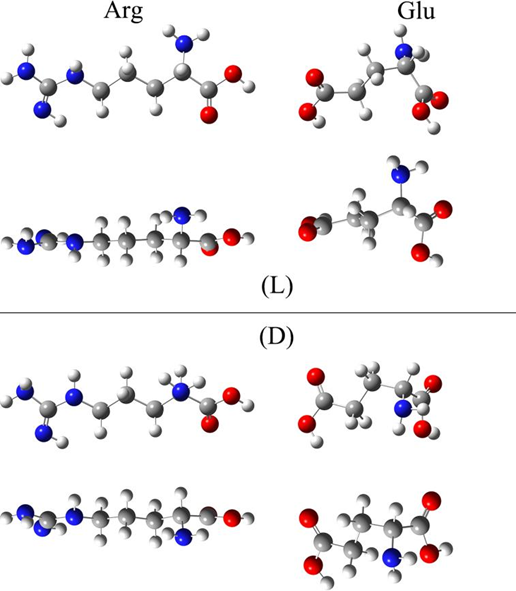

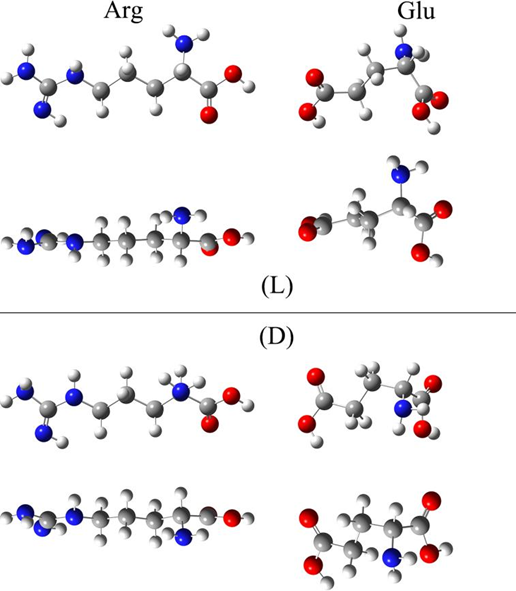


**M***S*,*S*

*D*-Arg

*L*-Arg

*D*-Glu

*L*-Glu

**Fig. S14** Lowest-energy configurations of **M***S*,*S*, *D*-/*L*-Arg, and *D*-/*L*-Glu.


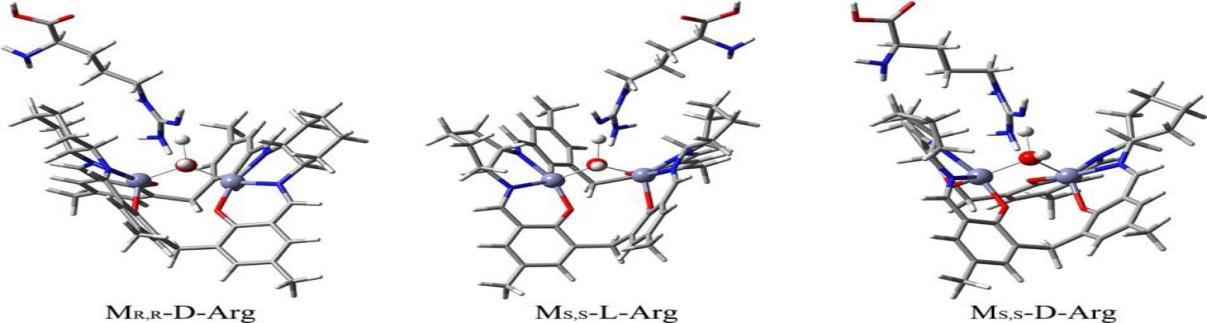

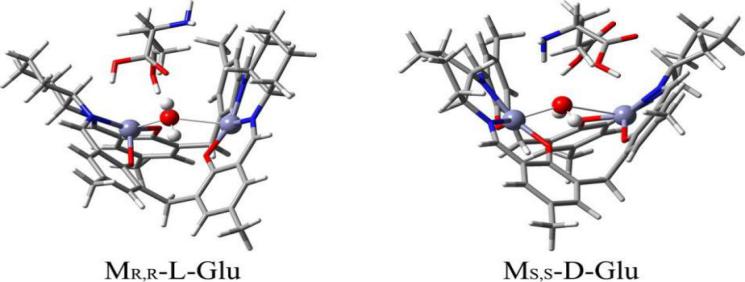

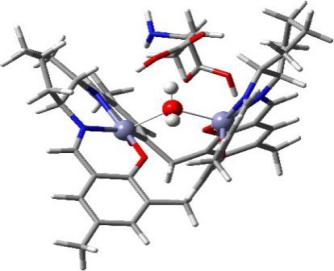


**M***S*,*S***-***L*-Arg

**M***S*,*S***-***D*-Arg

**M***S*,*S***-***L*-Glu

**M***S*,*S***-***D*-Glu

**Fig. S15** Optimized structures of **M***S*,*S* with*D*-/*L*-Arg and *D*-/*L*-Glu.

**
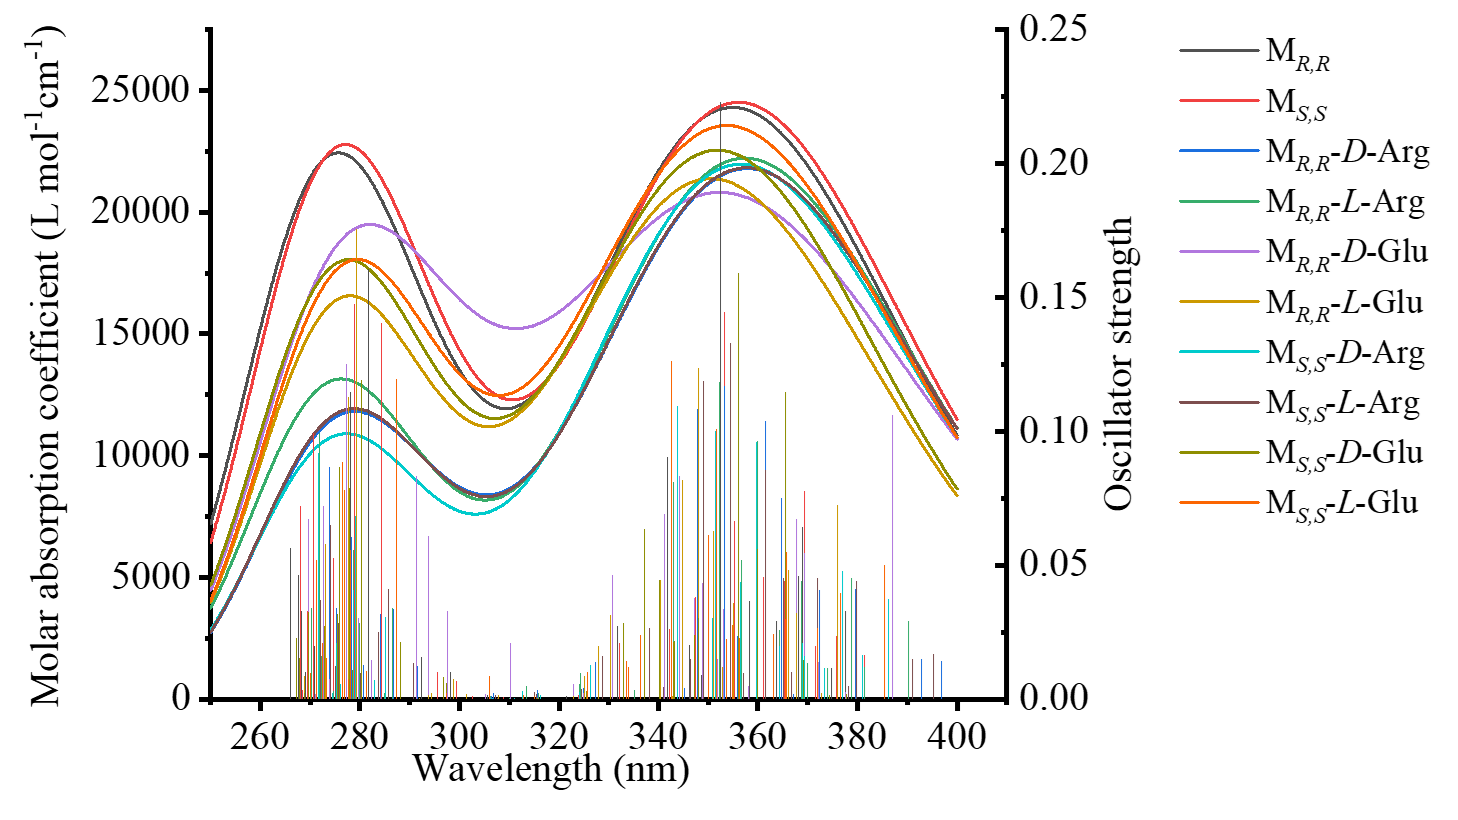
**

**Fig. S16** The corresponding UV-Vis spectra calculated by TD-DFT.


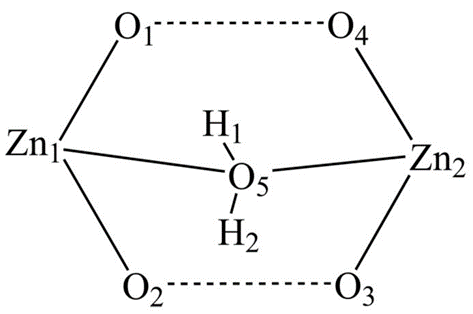


**Fig. S17** Schematic diagram of the macrocycle structure.

**Table S1** Crystal data and structure refinements of complex **M***R*,*R.*

| Complex | **M***R*,*R* |
| --- | --- |
| CCDC | 2191564 |
| Empirical formula | C46H48N4O5Zn2 |
| Formula weight | 867.62 |
| Crystal system | triclinic |
| Space group | *P*1 |
| *a* / (Å) | 12.114(4) |
| *b* / (Å) | 14.667(5) |
| *c* / (Å) | 16.255(5) |
| *α* / (°) | 63.933(8) |
| *β* / (°) | 68.135(9) |
| *γ* / (°) | 89.986(9) |
| *V* / (Å3) | 2361.1(13) |
| *Z* | 2 |
| *D*c / (g·cm-3) | 1.220 |
| *θ* range / (°) | 2.65~24.50 |
| Absorption coefficient/ mm-1 | 1.061 |
| *F* (000) | 904 |
| Reflections collected | 43811 |
| Independent reflections | 14682 |
| Observed reflections (*I* >2*σ*(*I*)) | 5704 |
| Number of parameters | 1035 |
| Goodness-of-fit on *F* 2 | 0.864 |
| Final *R* indices(*I* >2*σ*(*I*)) | *R*1 = 0.0858, *wR*2 = 0.1857 |
| *R* indices (all data) | *R*1 = 0.2163, *wR*2 = 0.2306 |
| Largest diff. Peak and hole (eÅ-3) | 0.531 and -0.497 |

**Table S2** Maximum absorption peaks of host-guest adducts.

|  | λmax (nm) | +*L*-Arg (nm) | +*D*-Arg (nm) | +*L*-Glu (nm) | +*D*-Glu (nm) |
| --- | --- | --- | --- | --- | --- |
| M*R,R* | 275.7 | 276.3 | 279.0 | 278.0 | 282.0 |
| 354.9 | 357.4 | 357.9 | 350.5 | 352.3 |
| M*S,S* | 277.1 | 278.8 | 277.3 | 279.5 | 277.7 |
| 356.1 | 357.7 | 356.5 | 353.7 | 351.8 |

**Table S3** Mulliken charges of partial atoms in **M***R*,*R* and **M***S*,*S*.

|  | Zn1 | Zn2 | O1 | O2 | O3 | O4 | O5 | H1 | H2 |
| --- | --- | --- | --- | --- | --- | --- | --- | --- | --- |
| **M***R*,*R* | 1.01 | 1.01 | -0.73 | -0.70 | -0.68 | -0.68 | -0.84 | 0.51 | 0.44 |
| **M***S*,*S* | 1.01 | 1.00 | -0.68 | -0.68 | -0.70 | -0.73 | -0.84 | 0.51 | 0.44 |
